# Supplementary material
Source: ML conference proceedings conference paper supplement (https://openreview.net/forum?id=E2TJI6CKm0)
Supplement: supplementary_material [file attachment]

586 **A Proofs for Section 3.2**

587 We present rigorous proofs for Lemma 3.2, Theorems 3.3 and 3.4 in Section 3.2, justifying the  
 588 *soundness* and *optimality* of our VERIX approach. For better readability, we repeat each lemma and  
 589 theorem before their corresponding proofs.

590 **A.1 Proof for Lemma 3.2**

591 *Lemma 3.2* If the CHECK sub-procedure is *sound*, then, at the end of each for-loop iteration  
 592 (Lines 7-12) in Algorithm 1 the *irrelevant* set of indices  $\mathbf{B}$  satisfies

$$(\|\hat{\chi}^{\mathbf{B}} - \chi^{\mathbf{B}}\|_p \leq \epsilon) \wedge (\hat{\chi}^{\Theta \setminus \mathbf{B}} = \chi^{\Theta \setminus \mathbf{B}}) \Rightarrow |\hat{c} - c| \leq \delta. \quad (6)$$

593 *Proof.* Recall that the sub-procedure CHECK is *sound* means the deployed automated reasoner returns  
 594 True only if the specification actually holds. That is, from Line 10 we have

$$\phi \Rightarrow |\hat{c} - c| \leq \delta$$

595 holds on network  $f$ . Simultaneously, from Lines 8 and 9 we know that, to check the current feature  
 596  $\chi^i$  of the traversing order  $\pi$ , the pre-condition  $\phi$  contains

$$\phi \mapsto (\|\hat{\chi}^{\mathbf{B}^+} - \chi^{\mathbf{B}^+}\|_p \leq \epsilon) \wedge (\hat{\chi}^{\Theta \setminus \mathbf{B}^+} = \chi^{\Theta \setminus \mathbf{B}^+}).$$

597 Specifically, we prove this through induction on the number of iteration  $i$ . When  $i$  is 0, pre-condition  
 598  $\phi$  is initialized as  $\top$  and the specification holds trivially. In the inductive case, suppose CHECK returns  
 599 False, then the set  $\mathbf{B}$  is unchanged as in Line 12. Otherwise, if CHECK returns True, which makes  
 600 HOLD become True, then the current feature index  $i$  is added into the irrelevant set of feature indices  
 601  $\mathbf{B}$  as in Line 11, with such satisfying specification

$$(\|\hat{\chi}^{\mathbf{B}^+} - \chi^{\mathbf{B}^+}\|_p \leq \epsilon) \wedge (\hat{\chi}^{\Theta \setminus \mathbf{B}^+} = \chi^{\Theta \setminus \mathbf{B}^+}) \Rightarrow |\hat{c} - c| \leq \delta.$$

602 As the iteration proceeds, each time CHECK returns True, the irrelevant set  $\mathbf{B}$  is augmented with the  
 603 current feature index  $i$ , and the specification always holds as it is explicitly checked by the CHECK  
 604 reasoner.  $\square$

605 **A.2 Proof for Theorem 3.3**

606 *Theorem 3.3* (Soundness). If the CHECK sub-procedure is *sound*, then the value  $\mathbf{x}^{\mathbf{A}}$  returned by  
 607 Algorithm 1 is a *robust* explanation – this satisfies Equation (1) of Definition 2.1.

608 *Proof.* The for-loop from Line 6 indicates that Algorithm 1 goes through every each feature  $\mathbf{x}^i$  in  
 609 input  $\mathbf{x}$  by traversing the set of indices  $\Theta(\mathbf{x})$ . Line 5 means that  $\pi$  is one such instance of ordered  
 610 traversal. When the iteration ends, all the indices in  $\Theta(\mathbf{x})$  are either put into the irrelevant set of  
 611 indices by  $\mathbf{B} \mapsto \mathbf{B}^+$  as in Line 11 or the explanation index set by  $\mathbf{A} \mapsto \mathbf{A} \cup \{i\}$  as in Line 12. That  
 612 is,  $\mathbf{A}$  and  $\mathbf{B}$  are two disjoint index sets forming  $\Theta(\mathbf{x})$ ; in other words,  $\mathbf{B} = \Theta(\mathbf{x}) \setminus \mathbf{A}$ . Therefore,  
 613 combined with Lemma 3.2, when the reasoner CHECK is *sound*, once iteration finishes we have the  
 614 following specification

$$(\|\hat{\chi}^{\mathbf{B}} - \chi^{\mathbf{B}}\|_p \leq \epsilon) \wedge (\hat{\chi}^{\Theta \setminus \mathbf{B}} = \chi^{\Theta \setminus \mathbf{B}}) \Rightarrow |\hat{c} - c| \leq \delta. \quad (7)$$

615 holds on network  $f$ , where  $\hat{\chi}^{\mathbf{B}}$  is the variable representing all the possible assignments of irrelevant  
 616 features  $\mathbf{x}^{\mathbf{B}}$ , i.e.,  $\forall \mathbf{x}^{\mathbf{B}'}$ , and the pre-condition  $\hat{\chi}^{\Theta \setminus \mathbf{B}} = \chi^{\Theta \setminus \mathbf{B}}$  fixes the values of the explanation  
 617 features of an instantiated input  $\mathbf{x}$ . Meanwhile, the post-condition  $|\hat{c} - c| \leq \delta$  where  $c \mapsto f(\mathbf{x})$  as in  
 618 Line 3 ensures prediction invariance such that  $\delta$  is 0 for classification and otherwise a pre-defined  
 619 allowable amount of perturbation for regression. To this end, for some specific input  $\mathbf{x}$  we have the  
 620 following property

$$\forall \mathbf{x}^{\mathbf{B}'}. (\|\mathbf{x}^{\mathbf{B}'} - \mathbf{x}^{\mathbf{B}}\|_p \leq \epsilon) \Rightarrow |f(\mathbf{x}') - f(\mathbf{x})| \leq \delta. \quad (8)$$

621 holds. Here we prove by construction. According to Equation (1) of Definition 2.1, if the irrelevant  
 622 features  $\mathbf{x}^{\mathbf{B}}$  satisfy the above property, then we call the rest features  $\mathbf{x}^{\mathbf{A}}$  a *robust* explanation with  
 623 respect to network  $f$  and input  $\mathbf{x}$ .  $\square$

624 **A.3 Proof for Theorem 3.4**

625 *Theorem 3.4* (Optimality). If the CHECK sub-procedure is *sound* and *complete*, then the *robust*  
 626 explanation  $\mathbf{x}^A$  returned by Algorithm 1 is *optimal* – this satisfies Equation (2) of Definition 2.1

627 *Proof.* We prove this by contradiction. From Equation (2) of Definition 2.1, we know that explanation  
 628  $\mathbf{x}^A$  is optimal if, for any feature  $\chi$  in the explanation, there always exists an  $\epsilon$ -perturbation on  $\chi$  and  
 629 the irrelevant features  $\mathbf{x}^B$  such that the prediction alters. Let us suppose  $\mathbf{x}^A$  is not optimal, then there  
 630 exists a feature  $\chi$  in  $\mathbf{x}^A$  such that no matter how to manipulate this feature  $\chi$  into  $\chi'$  and the irrelevant  
 631 features  $\mathbf{x}^B$  into  $\mathbf{x}^{B'}$ , the prediction always remains the same. That is,

$$\exists \chi \in \mathbf{x}^A. \forall \mathbf{x}^{B'}, \chi'. \left\| (\mathbf{x}^B \oplus \chi) - (\mathbf{x}^{B'} \oplus \chi') \right\|_p \leq \epsilon \Rightarrow |f(\mathbf{x}) - f(\mathbf{x}')| \leq \delta, \quad (9)$$

632 where  $\oplus$  denotes concatenation of two features. When we pass this input  $\mathbf{x}$  and network  $f$  into the  
 633 VERIX framework, suppose Algorithm 1 examines this feature  $\chi$  at the  $i$ -th iteration, then as in  
 634 Line 7, the current irrelevant set of indices is  $\mathbf{B}^+ \mapsto \mathbf{B} \cup \{i\}$ , and accordingly the pre-conditions are

$$\phi \mapsto \left( \left\| \hat{\chi}^{\mathbf{B} \cup \{i\}} - \chi^{\mathbf{B} \cup \{i\}} \right\|_p \leq \epsilon \right) \wedge (\hat{\chi}^{\Theta \setminus (\mathbf{B} \cup \{i\})} = \chi^{\Theta \setminus (\mathbf{B} \cup \{i\})}). \quad (10)$$

635 Because  $\hat{\chi}^{\mathbf{B} \cup \{i\}}$  is the variable representing all the possible assignments of irrelevant features  $\mathbf{x}^B$   
 636 and the  $i$ -th feature  $\chi$ , i.e.,  $\forall \mathbf{x}^{B'}, \chi'$ , and meanwhile

$$\hat{\chi}^{\Theta \setminus (\mathbf{B} \cup \{i\})} = \chi^{\Theta \setminus (\mathbf{B} \cup \{i\})} \quad (11)$$

637 indicates that the other features are fixed with specific values of this  $\mathbf{x}$ . Thus, with  $c \mapsto f(\mathbf{x})$  in  
 638 Line 3, we have the specification  $\phi \Rightarrow |\hat{c} - c| \leq \delta$  holds on input  $\mathbf{x}$  and network  $f$ . Therefore, if the  
 639 reasoner CHECK is *sound* and *complete*,

$$\text{CHECK}(f, \phi \Rightarrow |\hat{c} - c| \leq \delta) \quad (12)$$

640 will always return True. Line 10 assigns True to HOLD, and index  $i$  is then put into the irrelevant  
 641 set  $\mathbf{B}$  thus  $i$ -th feature  $\chi$  in the irrelevant features  $\mathbf{x}^B$ . However, based on the assumption, feature  
 642  $\chi$  is in explanation  $\mathbf{x}^A$ , so  $\chi$  is in  $\mathbf{x}^A$  and  $\mathbf{x}^B$  simultaneously – a contradiction occurs. Therefore,  
 643 Theorem 3.4 holds.  $\square$

644 **B Supplementary experimental results**

645 **B.1 Sensitivity vs. random traversal to generate explanations**

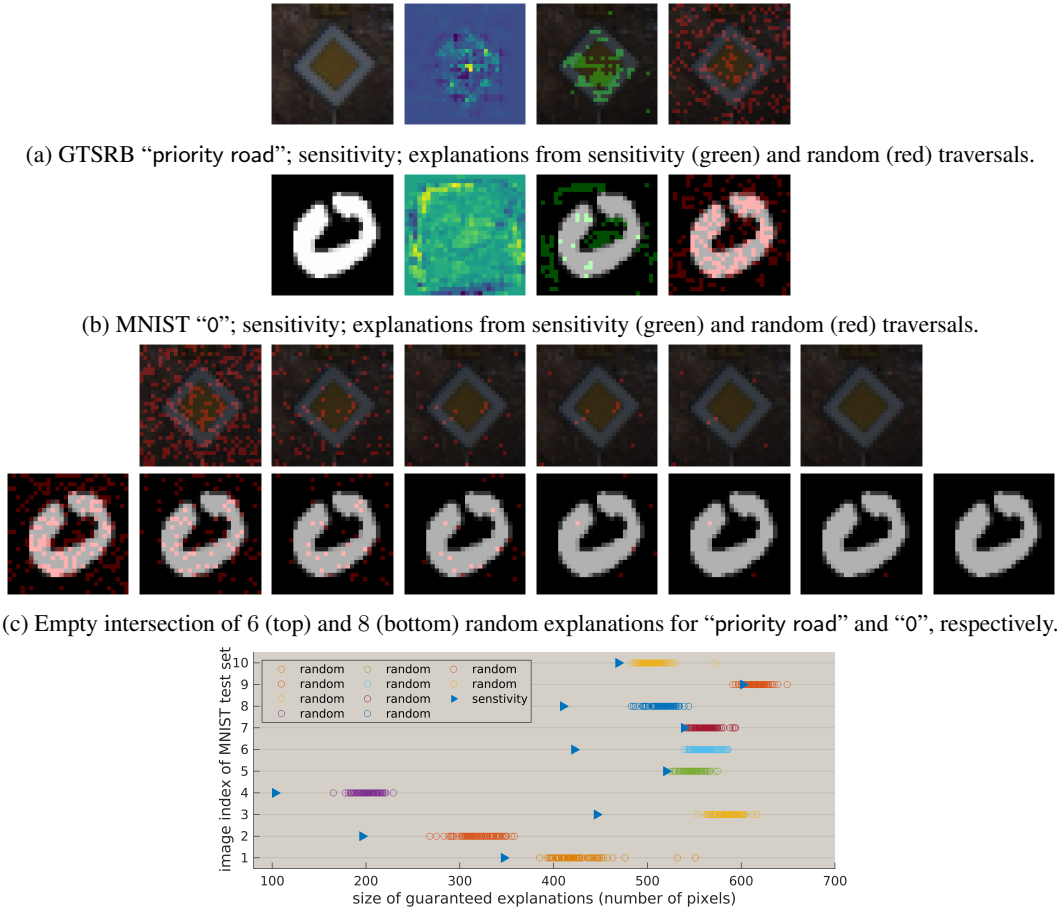

(d) Sensitivity vs. random traversals in explanation size. Each blue triangle denotes 1 deterministic explanation from sensitivity ranking, and each bunch of circles represents 100 explanations from random traversals.

Figure 10: VERIX explanations when using *sensitivity* (green) and random (red) traversals.

646 To show the advantage of the *sensitivity* traversal, Figure 10 compares VERIX explanations using  
 647 sensitivity-based and random traversal orders. The first column of Figures 10a and 10b shows the  
 648 original image; the second a heatmap of the sensitivity (with deletion  $\mathcal{T}(\chi) = 0$  for GTSRB and  
 649 reversal  $\mathcal{T}(\chi) = \bar{\chi} - \chi$  for MNIST because deleting background pixels of MNIST images may  
 650 contribute to little confidence change as they often have zero values); and the third and fourth columns  
 651 show explanations using the sensitivity and random traversals, respectively. Sensitivity, as shown in  
 652 the heatmaps, prioritizes pixels that have more influence on the network’s prediction. In contrast,  
 653 a random ranking is simply a shuffling of all the pixels. We observe that the sensitivity traversal  
 654 generates smaller and more sensible explanations. Furthermore, we also explore the idea of using  
 655 intersections of explanations generated from random traversals. Specifically, for both images, we  
 656 randomly traverse all input features 10 times and produce 10 explanations. In Figure 10c we show  
 657 the result of the first random explanation, followed by the result of intersecting this explanation with  
 658 more and more random explanations. The end result is an empty set (last one in each row). This  
 659 strongly emphasizes the necessity of a sensible traversal, for which we propose the feature-level  
 660 sensitivity traversal. In Figure 10d, we compare explanation sizes for the first 10 images (to avoid  
 661 potential selection bias) of the MNIST test set. For each image, we show 100 random traversal  
 662 explanations compared to the deterministic explanation from sensitivity traversal. We observe that  
 663 the latter is almost always smaller, often significantly so, suggesting that sensitivity-based traversals  
 664 are a reasonable heuristic for attempting to approach globally optimal explanations.

665 **B.2 Runtime performance**

Table 3: Average execution time (seconds) of CHECK and VERIX for *complete* verification. In particular, magnitude  $\epsilon$  is set to 3% across the Dense, Dense (large), CNN models and the MNIST, TaxiNet, GTSRB datasets for sensible comparison.

|                                   | Dense |        | Dense (large) |         | CNN   |          |
|-----------------------------------|-------|--------|---------------|---------|-------|----------|
|                                   | CHECK | VERIX  | CHECK         | VERIX   | CHECK | VERIX    |
| MNIST ( $28 \times 28$ )          | 0.013 | 160.59 | 0.055         | 615.85  | 0.484 | 4956.91  |
| TaxiNet ( $27 \times 54$ )        | 0.020 | 114.69 | 0.085         | 386.62  | 2.609 | 8814.85  |
| GTSRB ( $32 \times 32 \times 3$ ) | 0.091 | 675.04 | 0.257         | 1829.91 | 1.574 | 12935.27 |

Table 4: Average execution time (seconds) of CHECK and VERIX for *incomplete* verification. Magnitude  $\epsilon$  is 3% for both MNIST-sota and GTSRB-sota models.

|            | # ReLU | # MaxPool | CHECK | VERIX   |
|------------|--------|-----------|-------|---------|
| MNIST-sota | 50960  | 5632      | 2.31  | 1841.25 |
| GTSRB-sota | 106416 | 5632      | 8.54  | 8770.15 |

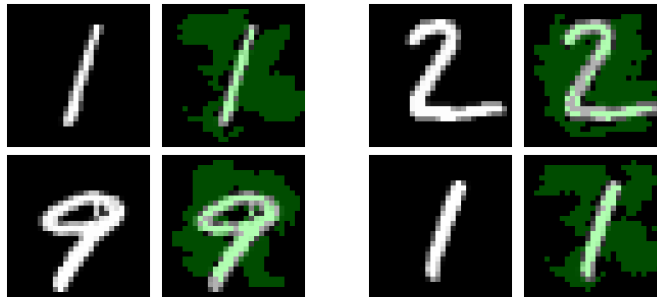

Figure 11: Sound but *incomplete* CHECK procedure CROWN contributes to robust but *not optimal* (larger than necessary) VERIX explanations for the convolutional network MNIST-sota.

666 We analyze the empirical time *complexity* of our VERIX approach in Table 3. The model structures  
 667 are described in Appendix D.4. Typically, the individual pixel checks (CHECK) return a definitive  
 668 answer (True or False) within a second on dense models and in a few seconds on convolutional  
 669 networks. For image benchmarks such as MNIST and GTSRB, larger inputs or more complicated  
 670 models result in longer (pixel- and image-level) execution times for generating explanations. As for  
 671 TaxiNet as a regression task, while its pixel-level check takes longer than that of MNIST, it is actually  
 672 faster in total time on dense models because TaxiNet does not need to check against other labels.

673 The *scalability* of VERIX can be improved if we perform incomplete verification, for which we  
 674 re-emphasize that the soundness of the resulting explanations is not undermined though optimality is  
 675 no longer guaranteed, i.e., they may be larger than necessary. To illustrate, we deploy the incomplete  
 676 CROWN [64] analysis (implemented in Marabou) to perform the CHECK sub-procedure. Table 4  
 677 reports the runtime performance of VERIX when using incomplete verification on state-of-the-art  
 678 network architectures with hundreds of thousands of neurons. See model structures in Appendix D.  
 679 Tables 6 and 8. Moreover, in Figure 11, we include some example explanations for the convolutional  
 680 model MNIST-sota when using the sound but incomplete CHECK procedure CROWN. We can see  
 681 that they indeed appear larger than the optimal explanations when the complete Marabou reasoner is  
 682 used. We remark that, as soundness of the explanations is not undermined, they still provide guarantees  
 683 against perturbations on the irrelevant pixels. Interestingly, MNIST explanations on convolutional  
 684 models tend to be less scattered than these on fully-connected models, as shown in Figures 4b and  
 685 5b due to the effect of convolutions. In general, the scalability of VERIX will grow with that of  
 686 verification tools, which has improved significantly in the past several years as demonstrated by the  
 687 results from the Verification of Neural Networks Competitions (VNN-COMP) [3].

## 688 C Supplementary related work

### 689 C.1 Related work (cont.)

690 Continued from Section 5, our work expands on [31] in four important ways: (i) we focus on  $\epsilon$ -ball  
691 perturbations and perception models, whose characteristics and challenges are different from those of  
692 NLP models; (ii) whereas [31] simply points to existing work on hitting sets and minimum satisfying  
693 assignments for computing OREs, we provide a detailed algorithm with several illustrative examples,  
694 and include a concrete traversal heuristic that performs well in practice; we believe these details  
695 are useful for anyone wanting to produce a working implementation; (iii) we note for the first time  
696 the relationship between OREs and counterfactual explanations; and (iv) we provide an extensive  
697 evaluation on a variety of perception models. We also note that in some aspects, our work is more  
698 limited: in particular, we use a simpler definition of ORE (without a cost function) as our algorithm  
699 is specialized for the case of finding explanations with the fewest features.

700 We discuss some further related work in the formal verification community that are somewhat centered  
701 around interpretability or computing minimal explanations. [13] uses formal techniques to identify  
702 input regions around an adversarial example such that all points in those regions are also guaranteed to  
703 be adversarial. Their work improves upon previous work on identifying *empirically robust* adversarial  
704 regions, where points in the regions are empirically likely to be adversarial. Analogously, our work  
705 improves upon informal explanation techniques like Anchors. [11] is similar to [13] in that it also  
706 computes pre-images of neural networks that lead to bad outputs. In contrast, we compute a subset of  
707 input features that preserves the neural network output. [65] is more akin to our work, with subtle yet  
708 important differences. Their goal is to identify a *minimal* subset of input features that when *corrected*,  
709 *changes* a network’s prediction. In contrast, our goal is to find a *minimal* subset of input features  
710 that when *fixed*, *preserves* a network’s prediction. These two goals are related but not equivalent:  
711 given a correction set found by [65], a sound but non-minimal VERIX explanation can be obtained  
712 by fixing all features not in the correction set along with one of the features in the correction set.  
713 Symmetrically, given a VERIX explanation, a sound but non-minimal correction can be obtained by  
714 perturbing all the features not in the explanation along with one of the features in the explanation.  
715 This relation is analogous to that between minimal correction sets and minimal unsatisfiable cores in  
716 constraint satisfaction (e.g., [33]). Both are considered standard explanation strategies in that field.

### 717 C.2 Verification of neural networks

718 Researchers have investigated how automated reasoning can aid verification of neural networks with  
719 respect to formally specified properties [34, 20], by utilizing reasoners based on abstraction [64, 44, 16,  
720 47, 39, 52, 53, 2, 63, 55, 57] and search [14, 28, 29, 21, 54, 46, 19, 7, 12, 42, 60, 59, 5, 30, 15, 56, 58].  
721 Those approaches mainly focus on verifying whether a network satisfies a certain pre-defined property  
722 (e.g., robustness), i.e., either prove the property holds or disprove it with a counterexample. However,  
723 this does not shed light on *why* a network makes a specific prediction. In this paper, we take a step  
724 further, repurposing those verification engines as sub-routines to inspect the decision-making process  
725 of a model, thereby explaining its behavior (through the presence or absence of certain input features).  
726 The hope is that these explanations can help humans better interpret machine learning models and  
727 thus facilitate appropriate deployment.

## 728 D Model specifications

729 Apart from those experimental settings in Section 4, we include detailed model specifications for  
730 reproducibility and reference purposes. Although evaluated on the MNIST [32], GTSRB [45], and  
731 TaxiNet [27] image datasets – MNIST and GTSRB in classification and TaxiNet in regression, our  
732 VERIX framework can be generalized to other machine learning applications such as natural language  
733 processing. As for the sub-procedure CHECK of Algorithm 1, while VERIX can potentially incor-  
734 porate existing automated reasoners, we deploy the neural network verification tool Marabou [29].  
735 While it supports various model formats such as .pb from TensorFlow [1] and .h5 from Keras [8], we  
736 employ the cross platform .onnx format for better Python API support. When importing a model with  
737 softmax as the final activation function, we remark that, for the problem to be *decidable*, one needs  
738 to specify the `outputName` parameter of the `read_onnx` function as the pre-softmax logits. As a  
739 workaround for this, one can also train the model without softmax in the last layer and instead use  
740 the `SoftmaxLoss` loss function from the `tensorflow_ranking` package. Either way, VERIX produces  
741 consistent results.

### 742 D.1 MNIST

743 For MNIST, we train a fully-connected feed-forward neural network with 3 dense layers activated  
744 with ReLU (first 2 layers) and softmax (last classification layer) functions as in Table 5, achieving  
745 92.26% accuracy. While the MNIST dataset can easily be trained with accuracy as high as 99.99%,  
746 we are more interested in whether a very simple model as such can extract sensible explanations – the  
747 answer is yes. Meanwhile, we also train several more complicated MNIST models, and observe that  
748 their optimal explanations share a common phenomenon such that they are relatively more scattered  
749 around the background compared to the other datasets. This cross-model observation indicates  
750 that MNIST models need to check both the presence and absence of white pixels to recognize the  
751 handwritten digits correctly. Besides, to show the scalability of VERIX, we also deploy incomplete  
752 verification on state-of-the-art model structure as in Table 6.

### 753 D.2 GTSRB

754 As for the GTSRB dataset, since it is not as identically distributed as MNIST, to avoid potential  
755 distribution shift, instead of training a model out of the original 43 categories, we focus on the top  
756 first 10 categories with highest occurrence in the training set. This allows us to obtain an appropriate  
757 model with high accuracy – the convolutional model we train as in Table 7 achieves a test accuracy  
758 of 93.83%. It is worth mentioning that, our convolutional model is much more complicated than the  
759 simple dense model in [24], which only contains one hidden layer of 15 or 20 neurons trained to  
760 distinguish two MNIST digits. Also, as shown in Table 4 of Section B.2, we report results on the  
761 state-of-the-art GTSRB classifier in Table 8.

### 762 D.3 TaxiNet

763 Apart from the classification tasks performed on those standard image recognition benchmarks, our  
764 VERIX approach can also tackle regression models, applicable to real-world safety-critical domains.  
765 In this vision-based autonomous aircraft taxiing scenario [27] of Figure 9, we train the regression  
766 model in Table 9 to produce an estimate of the cross-track distance (in meters) from the ownship to  
767 the taxiway centerline. The TaxiNet model has a mean absolute error of 0.824 on the test set, with no  
768 activation function in the last output layer.

### 769 D.4 Dense, Dense (large), and CNN

770 In Section B.2 we analyze execution time of VERIX on three models with increasing complexity:  
771 Dense, Dense (large), and CNN as in Tables 10, 11, and 12, respectively. To enable a fair and  
772 sensible comparison, those three models are used across the MNIST, TaxiNet, and GTSRB datasets  
773 with only necessary adjustments to accommodate each task. For example, in all three models  $h \times w \times c$   
774 denotes different input size `height`  $\times$  `width`  $\times$  `channel` for each dataset. For the activation function  
775 of the last layer, softmax is used for MNIST and GTSRB while TaxiNet as a regression task needs no  
776 such activation. Finally, TaxiNet deploys `he_uniform` as the `kernel_initializer` parameter in the  
777 intermediate dense and convolutional layers for task specific reason.

Table 5: Structure for the MNIST classifier.

| Layer Type      | Parameter               | Activation |
|-----------------|-------------------------|------------|
| Input           | $28 \times 28 \times 1$ | –          |
| Flatten         | –                       | –          |
| Fully Connected | 10                      | ReLU       |
| Fully Connected | 10                      | ReLU       |
| Fully Connected | 10                      | softmax    |

Table 7: Structure for the GTSRB classifier.

| Type            | Parameter                 | Activation |
|-----------------|---------------------------|------------|
| Input           | $32 \times 32 \times 3$   | –          |
| Convolution     | $3 \times 3 \times 4$ (1) | –          |
| Convolution     | $2 \times 2 \times 4$ (2) | –          |
| Fully Connected | 20                        | ReLU       |
| Fully Connected | 10                        | softmax    |

Table 6: Structure for the MNIST-sota classifier.

| Type            | Parameter               | Activation |
|-----------------|-------------------------|------------|
| Input           | $28 \times 28 \times 1$ | –          |
| Convolution     | $3 \times 3 \times 32$  | ReLU       |
| Convolution     | $3 \times 3 \times 32$  | ReLU       |
| MaxPooling      | $2 \times 2$            | –          |
| Convolution     | $3 \times 3 \times 64$  | ReLU       |
| Convolution     | $3 \times 3 \times 64$  | ReLU       |
| MaxPooling      | $2 \times 2$            | –          |
| Flatten         | –                       | –          |
| Fully Connected | 200                     | ReLU       |
| Dropout         | 0.5                     | –          |
| Fully Connected | 200                     | ReLU       |
| Fully Connected | 10                      | softmax    |

Table 8: Structure for the GTSRB-sota classifier.

| Type            | Parameter               | Activation |
|-----------------|-------------------------|------------|
| Input           | $28 \times 28 \times 1$ | –          |
| Convolution     | $3 \times 3 \times 32$  | ReLU       |
| Convolution     | $3 \times 3 \times 32$  | ReLU       |
| Convolution     | $3 \times 3 \times 64$  | ReLU       |
| MaxPooling      | $2 \times 2$            | –          |
| Convolution     | $3 \times 3 \times 64$  | ReLU       |
| Convolution     | $3 \times 3 \times 64$  | ReLU       |
| MaxPooling      | $2 \times 2$            | –          |
| Flatten         | –                       | –          |
| Fully Connected | 200                     | ReLU       |
| Dropout         | 0.5                     | –          |
| Fully Connected | 200                     | ReLU       |
| Fully Connected | 10                      | softmax    |

Table 9: Structure for the TaxiNet model.

| Type            | Parameter               | Activation |
|-----------------|-------------------------|------------|
| Input           | $27 \times 54 \times 1$ | –          |
| Flatten         | –                       | –          |
| Fully Connected | 20                      | ReLU       |
| Fully Connected | 10                      | ReLU       |
| Fully Connected | 1                       | –          |

Table 10: Structure for the Dense model.

| Layer Type      | Parameter             | Activation  |
|-----------------|-----------------------|-------------|
| Input           | $h \times w \times c$ | –           |
| Flatten         | –                     | –           |
| Fully Connected | 10                    | ReLU        |
| Fully Connected | 10                    | ReLU        |
| Fully Connected | 10 / 1                | softmax / – |

Table 11: Structure for Dense (large).

| Layer Type      | Parameter             | Activation  |
|-----------------|-----------------------|-------------|
| Input           | $h \times w \times c$ | –           |
| Flatten         | –                     | –           |
| Fully Connected | 30                    | ReLU        |
| Fully Connected | 30                    | ReLU        |
| Fully Connected | 10 / 1                | softmax / – |

Table 12: Structure for the CNN model.

| Layer Type      | Parameter             | Activation  |
|-----------------|-----------------------|-------------|
| Input           | $h \times w \times c$ | –           |
| Convolution     | $3 \times 3 \times 4$ | –           |
| Convolution     | $3 \times 3 \times 4$ | –           |
| Fully Connected | 20                    | ReLU        |
| Fully Connected | 10 / 1                | softmax / – |
